# Supplementary material for: Lake mixing regime selects apparent methane oxidation kinetics of the methanotroph assemblage
Source: Copernicus journal article supplement (doi:10.5194/bg-17-4247-2020), 2020-08-26
Supplement: Supplementary file 1 [file bg-17-4247-2020-supplement.zip]

Archive with 6 entries (6 files):
- Supplementary_file_4_TPM_pmoCAB.txt
- Supplementary_Calculation_Figures_Tables.pdf
- Supplementary_file_1_custom_database_pmoA.fa.txt
- Supplementary_file_2_custom_database_pmoB.fa.txt
- bg-17-4247-2020-supplement-title-page.pdf
- Supplementary_file_3_custom_database_pmoC.fa.txt
