# Supplementary material for: Lake mixing regime selects apparent methane oxidation kinetics of the methanotroph assemblage
Source: Copernicus journal article supplement (doi:10.5194/bg-17-4247-2020), 2020-08-26
Supplement: Supplementary file 1 [file bg-17-4247-2020-supplement.zip › bg-17-4247-2020-supplement-title-page.pdf]

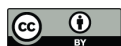

## *Supplement of*

# **Lake mixing regime selects apparent methane oxidation kinetics of the methanotroph assemblage**

**Magdalena J. Mayr et al.**

*Correspondence to:* Magdalena J. Mayr ([magdalena.mayr@eawag.ch](mailto:magdalena.mayr@eawag.ch))

- [bg-17-4247-2020-supplement-title-page.pdf](#)
- [Supplementary\\_Calculation\\_Figures\\_Tables.pdf](#)
- [Supplementary\\_file\\_1\\_custom\\_database\\_pmoA.fa.txt](#)
- [Supplementary\\_file\\_2\\_custom\\_database\\_pmoB.fa.txt](#)
- [Supplementary\\_file\\_3\\_custom\\_database\\_pmoC.fa.txt](#)
- [Supplementary\\_file\\_4\\_TPM\\_pmoCAB.txt](#)

The copyright of individual parts of the supplement might differ from the CC BY 4.0 License.
