# Supplementary material for: Lake mixing regime selects apparent methane oxidation kinetics of the methanotroph assemblage
Source: Copernicus journal article supplement (doi:10.5194/bg-17-4247-2020), 2020-08-26
Supplement: Supplementary file 1 [file bg-17-4247-2020-supplement.zip › Supplementary_file_1_custom_database_pmoA.fa.txt]

>WP_085769855.1 methane monooxygenase/ammonia monooxygenase subunit A [Methylocystis bryophila][pxmA]
MTATDLESAVQPYAGEKARLSRAYDYLILVLAFFLFVGAFHLHVALTVGDWDFWLDWKDRQWWPLITPLM
MITFPAAVQAVLWPNFRLPLGATLCISCLLIGTWITRVFAYHLWNYFPINEVLPATMLPSALVLDAVLML
SNSLTITSIFGGMAFALLFYPSNWPIFAMFHVPVEYGGAQLTVADLFGFQYVRAGTPEYLRLIERGTLRT
YGQYATPLSAFCAALLCTLMYPLWWWLGKAFATTKYVKNI

>AMK75760.1 methane monooxygenase/ammonia monooxygenase subunit A [Methylomonas denitrificans][pxmA]
MSAQIPISTFKPYRGEKARLARAYDYLILVLALFLFIGSFHLHFALTVGDWDFWVDWKDRQWWPLVTPLI
GITFPAAVQAVLWDKFRLPLGATLCVAALLLGTWVTRVFAYHYWNYFPINMVLPATMIPGALVLDTLLML
TNSLTITSIFGGAAFALLFYPTNWPIFGMFHQPVEVANSQLTVADLFGFQYIRTGMPEYLRIIERGTLRT
YGQYATPLAAFCSALLCSLMYPLWWYIGKWFANTRYLKKI

>AMK77276.1 methane monooxygenase/ammonia monooxygenase subunit A [Methylomonas denitrificans][pmoA]
MSASQSAVRSRAEAVQVSRTFDWMILFTLFTAVLGGYHIHYMLTGGDWDFWTDWKDRRLWVTVAPIVSIT
FPAAVQACLWWRYRLPVGATLSVVALMIGEWINRYMNFWGWTYFPVNICFPSNLLPGAIVLDVILMLGNS
MTLTAVVGGLAYGLLFYPGNWPVIAPLHVPVEYNGMMMTLADLQGYHYVRTGTPEYIRMVEKGTLRTFGK
DVAPVSAFFSGFVSIIIYFLWHFFGRWFAKTDFIADDAS
>WP_085772041.1 methane monooxygenase/ammonia monooxygenase subunit A [Methylocystis bryophila][pmoA2]
MSVSAAPIGKAWKSKEEFLGCVILTDWILLFVLFLVLLGSYHIHYMLLAGDWDFWIDFKDRRMWPTVAPI
VAMCFAAAAQSFFWTKFRLPFGATVVTLALLVGEWINRYDNFWGWTFFPISLVFPSALIPMAFWLDVVLL
ISGSWLVTALLGSLGWGLLFYPSNWPVLAQYHQAAEIDGVLLTLADLIGFNYVRTGTPEYIRMIERGTLR
TFGKDVVPVAAFFSSFISMLVYFLWWKIGMWFARTDYVKAEDI

>WP_085772257.1 methane monooxygenase/ammonia monooxygenase subunit A [Methylocystis bryophila][pmoA1]
MSTSKSGGAVGPFHSVAEAAGCVQTTDWMLLTLLFFAVLGGYHVHFMLTAGDWDFWVDWKDRRMWPTVVP
ILGVTFAAASQAFFWVNFRLPFGAVFAVLGLLIGEWINRYVNFWGWTYFPISLVFPSALMVPAIWLDVIL
LLSGSYVITAVIGALGWGLLFYPNNWPAIGQFHQATEQHGQLMSLADLIGFHFVRTSMPEYIRMVERGTL
RTFGKDVVPVAAFFSGFVSMLVYFAWWWLGRFYSTTKVIKEI

>WP_085772257.1 methane monooxygenase/ammonia monooxygenase subunit A [Methylocystis bryophila][pmoA1b]
MSTSKSGGAVGPFHSVAEAAGCVQTTDWMLLTLLFFAVLGGYHVHFMLTAGDWDFWVDWKDRRMWPTVVP
ILGVTFAAASQAFFWVNFRLPFGAVFAVLGLLIGEWINRYVNFWGWTYFPISLVFPSALMVPAIWLDVIL
LLSGSYVITAVIGALGWGLLFYPNNWPAIGQFHQATEQHGQLMSLADLIGFHFVRTSMPEYIRMVERGTL
RTFGKDVVPVAAFFSGFVSMLVYFAWWWLGRFYSTTKVIKEI

>WP_033157542.1 MULTISPECIES: ammonia monooxygenase [Methylomonas][pxmA]
MSAQIPISTFKPYRGEKARLARAYDYLILVLALFLFIGSFHLHFALTVGDWDFWVDWKDRQWWPLVTPLI
GITFPAAVQAVLWDKFRLPLGATLCVAALLIGTWVARIFAYHYWNFFPVNMVLPATMVPGALVLDTLLML
TNSLTITSIFGGGAFALLFYPTNWPIFGMFHQAVEYHNSQLTVADLFGFQYIRTGMPEYLRIIERGTLRT
YGQYATPLAAFCSALLCSLMYPLWWYIGKWFATTRYLKKI

>WP_033159227.1 methane monooxygenase/ammonia monooxygenase subunit A [Methylomonas sp. LW13][pmoA]
MSASQSAVRSRAEAVQVSRTFDWMILFTLFTAVLGGYHIHYMLTGGDWDFWTDWKDRRLWVTVAPIVSIT
FPAAVQACLWWRYRLPVGATLSVVALMIGEWINRYMNFWGWTYFPVNICFPSNLLPGAIVLDVILMLGNS
MTLTAVLGGLAYGLLFYPGNWPVIAPLHVPVEYNGMMMTLADLQGYHYVRTGTPEYIRMVEKGTLRTFGK
DVAPVSAFFSGFVSIIIYFLWHFFGRWFAKTDFIADDAS

>OOO02385.1 Particulate methane monooxygenase beta subunit [Chromatiales bacterium USCg_Taylor][pmoA_USCg]
MSSLSPTVFTKAEIIQASRTADWLILVFAFLVFTGGFHVHAMLTMGDWDFWTDWKDRRLWVTVTPIMCIT
FPAAVQYWMWDKLRLPLGATFTILGLLFGEWVNRYFNFWGWTYFPINFVWAATLVPGAIILDVILLWSKS
FLITAVIGGLAFGLIFYPGNWSMLAVLHQPVEYNGMVMTIADIQGYHYVRTGTPEYIRFVEKGTLRTFGK
DVVPVSAFFSGFICILIYFIWHFFGRWYSTTRFIDQY

>CCJ08278.1 Particulate methane monooxygenase subunit A [Methylocystis sp. SC2]
MSQSKSGGAVGPFNSVAEAAGCVQTVDWMLLVLLFFAVLGGYHVHFMLTAGDWDFWVDWKDRRMWPTVVP
ILGVTFCAAAQAFWWVNFRLPFGAVFAALGLLIGEWINRYVNFWGWTYFPISLVFPSALIVPAIWLDVIL
LLSGSYVITAIVGSLGWGLLFYPNNWPAIAAFHQATEQHGQLMTLADLIGFHFVRTSMPEYIRMVERGTL
RTFGKDVVPVAAFFSGFVSMMVYFLWWFMGRWYSTTKIIDTI

>CCJ08985.1 Particulate methane monooxygenase subunit A [Methylocystis sp. SC2]
MSQSKSGGAVGPFNSVAEAAGCVQTVDWMLLVLLFFAVLGGYHVHFMLTAGDWDFWVDWKDRRMWPTVVP
ILGVTFCAAAQAFWWVNFRLPFGAVFAALGLLIGEWINRYVNFWGWTYFPISLVFPSALIVPAIWLDVIL
LLSGSYVITAIVGSLGWGLLFYPNNWPAIAAFHQATEQHGQLMTLADLIGFHFVRTSMPEYIRMVERGTL
RTFGKDVVPVAAFFSGFVSMMVYFLWWFMGRWYSTTKIIDTI
