# Supplementary material for: Lake mixing regime selects apparent methane oxidation kinetics of the methanotroph assemblage
Source: Copernicus journal article supplement (doi:10.5194/bg-17-4247-2020), 2020-08-26
Supplement: Supplementary file 1 [file bg-17-4247-2020-supplement.zip › Supplementary_file_2_custom_database_pmoB.fa.txt]

>ACE95891.2 particulate methane monooxygenase subunit B-like protein [Methylomonas sp. LW13] [pxmB]
MVMKSLFKPWLLALLCVNVLSIFTVPTAQAHGEKALEPFIRMRTIQWYDVQWSTQKFNVNDEVSVSGKFH
VAEDWPISVPKPEATFLNISTPGPVLIRTERYLNGKPWTNSVALEPGGDYEFKVVMKGRLPGHYHIHPFF
NLKDAGQVMGPGVWLDIGGDPADFSNTIQTINGEMIDMESFGFANGVFWHLFWGALAAAWLLWWVRRPLF
ISRYRMLDAGLEHELITARDKVIAKAVLVGIPVLVLVINSVTNSRYPDTIPLQAGLDRILPLPAQVNAGT
VNVDTLKAEYNVAQRAMVLQVSVDNRSQGAVRIGEFSSSNVHFMNDDLSEVGNVPGKDDVSNKGLSLNDN
TPIAPGEQRTVTIEVRDAAWESEKLDGLIKDADSRVGGLLFLYDDVMGKRYISSISAAVIPKFN

>ACE95892.2 particulate methane monooxygenase subunit B-like protein [Methylomonas methanica] [pxmB]
MKSLFKPWMLALLFLNVLSVLSVPTAQAHGEKALEPFIRMRTIQWYDVQWSTQKFNVNDEVSVSGKFHVA
EDWPVSVPKPEASFLNISTPGPVLIRTERYLNGKPWTNSVALEPGGDYDFKVVLKGRLPGRYHIHPFFNL
KDAGQVMGPGVWLEIGGNPSDFTNTIKTINGELIDMESFGFANGVFWHLFWGLLAAAWLLWWVRRPLFIS
RYRMLDAGLEHELITDQDKLIAKAVLVGVPVLVLALNAVTANSYPDAIPLQAGLDRILPLPAKVNAGTVN
VDTIKAEYNVAQRAMVLQVSVDNRSQGAVRIGEFSTSNVHFMNADLSAVGNVSGKDDVSNKGLSLDNNAP
IEPGEQRTVTIEVRDAAWESEKLDGLIKDADSRLGGLLFLYDDVMGKRYISSISAAVIPKFN

>WP_085769854.1 methane monooxygenase/ammonia monooxygenase subunit B [Methylocystis bryophila][pxmB]
MRNSLKSLFLGLGLAVVAQLGSPTAALAHGEKALEPFVRMRTIQFYDVEWSKNILAVNDEVVLTGKFHVA
EDWPRGVAKPDAAYLNVSAPGPVLVRTERYINGQPSVSSFALKLGGDYEFKIVLKARVPGRFHIHPFFNL
HDAGPVMGPGEWVEISGQPAAFVNPVKTLDGAVIDMESYGLVNGVIWHLLWIALGSAWLVWWVRRPLFLP
RFRRVREGRDAELISPVDKKIALAILVGVPAVVLAANALADRQYPYAIPLQAALDQINPLPPIVNSGLVS
AKIQRVEFNIPGRAVTLFALIHNGSDQPVRVTEFATANVRFLAPGANDANQQNSRNTDAGVVRDGLTIDR
AEAIAPGETRALRITAADALWQKERLDGLVRDADSRIGGLLFLADPTGARHIASVASAVIPKFNSATGSA
TTEK

>AMK75759.1 methane monooxygenase/ammonia monooxygenase subunit B [Methylomonas denitrificans][pxmB]
MKSLFKPWMLALLFLNVLSVLSVPTAQAHGEKALEPFIRMRTIQWYDVQWSTQKFNVNDEVSVSGKFHVA
EDWPVSVPKPEASFLNISTPGPVLIRTERYLNGKPWTNSVALEPGGDYDFKVVLKGRLPGRYHIHPFFNL
KDAGQVMGPGVWLEIGGNPSDFTNTIKTINGELIDMESFGFANGVFWHLFWGLLAAAWLLWWVRRPLFIS
RYRMLDAGLEHELITDQDKLIAKAVLVGVPVLVLALNAVTANSYPDAIPLQAGLDRILPLPAKVNAGTVN
VDTIKAEYNVAQRAMVLQVSVDNRSQGAVRIGEFSTSNVHFMNADLSAVGNVSGKDDVSNKGLSLDNNAP
IEPGEQRTVTIEVRDAAWESEKLDGLIKDADSRLGGLLFLYDDVMGKRYISSISAAVIPKFN

>AMK77277.1 methane monooxygenase/ammonia monooxygenase subunit B [Methylomonas denitrificans][pmoB]
MKIIKDKVAKLSFVALLVAMTAAMFYAPTASAHGEKSQAAFMRMRTIHWFDLNWSKEEVPVNETMTISGK
FLVFAGWPETVDKPEVSFLNVGIPGPVFIRAGSWIGGQLVPRSVSLELGEVYEFKVLLKARRPGDWHVHS
MMNVQGGGPIIGPGKWVTITGSMSEFVNPVTTLTGQTINLENYALDNVYFWHAVWFAIAFAWLLFWIKRP
LFVPRHIAVSTGKADSLISAGDKKIGMLFGVGTLVIVAASMGATNEKYPVTTPLQAGLLRGMKTYQMPEA
TVSVKVDDATYRVPGRAMQMTLTITNNGDSAVRLGEFNTAGVRFLDPAVHEDDTAYPDDLLAEEGLTVSD
NSPLAPGETRTVEVTASDAAWEVYRLADLIYDPDSRFAGLLFFWDEKGNRQLVTVDAPLIPTFI

>WP_085772042.1 methane monooxygenase/ammonia monooxygenase subunit B [Methylocystis bryophila][pmoB2]
MKIIKDKVAKLSFVALLVAMTAAMFYAPTASAHGEKSQAAFMRMRTIHWFDLNWSKEEVPVNETMTISGK
MNLGITQILSKLAGKRALRAAAFGLAALCGATTLIEATPASAHGERSQQAFLRMRTLNWYDVKWSKTELN
VNDEMEITGKVHVFSGWPQAVAKPEEAFLNIGEPGPVLIRKASFVSGIPAPRTFSMSVGRDYEYRIVMKA
RRQGRFHVHVQINVKDGGPIVGPGQWITIKGDMANFVNDVTLLDGSTIDLEKYGIPWTFTYHFIWMAAAA
VWVIYWFMQKGIIARGWQVAAGKGNEIITIRDKRFGGIWLAASLLALLFFYARANAEFPRTLPMQAGLLK
GIEPMDEEIPLVTAHYQGGSYKVPGRELSIKLKITNKGKEPLRIGEFTTAGLRFLNPDVFDHRPEYPEYL
LAERGLSVSDPSPIAPGETKEVTVVVQDARFDIERLSDLAYDTDSQFGGLLFLFDPSAKRYKVELGGPVI
PRFQAGASL

>WP_085772258.1 methane monooxygenase/ammonia monooxygenase subunit B [Methylocystis bryophila][pmoB1]
MKALVKLAALGAAAVVATVGAAAPAFAHGEKSQQAFLRMRTLNWYDVAWSKTSVAVNEEMVLSGKVHVFS
AWPQAVANPRVSFLNAGEPGPVLVRTAQFIGEQFAPRSFSMVPGNDYAFSINLRGRRAGRWHVHAQINVE
GGGPIIGPGQWIEIKGDMKDFTDPVTLLDGTTIDLEHYGISRVYAWHMPWLIVGAAWILFWFVRKGIIAS
YLRVAEGRDDEATTDEDRRIGAIVLALTILATIFGYAYTNSQFPRTIPLQAGLQKPLTPITSTGTVGVGK
DQVSVDLGGGVYKVPGRELTINVKVKNSTAHPLRLGEYTTAGLRFLNPDVFTTKPEFPDYLLADRGLSTD
PTPIAPGETKDIVVKVQDARWDIERLSDLAYDTDSQIGGLLFFFTPDGQRYAAEIGGPVIPKFVAGDMP

>WP_085772258.1 methane monooxygenase/ammonia monooxygenase subunit B [Methylocystis bryophila][pmoB1b]
MKALVKLAALGAAAVVATVGAAAPAFAHGEKSQQAFLRMRTLNWYDVAWSKTSVAVNEEMVLSGKVHVFS
AWPQAVANPRVSFLNAGEPGPVLVRTAQFIGEQFAPRSFSMVPGNDYAFSINLRGRRAGRWHVHAQINVE
GGGPIIGPGQWIEIKGDMKDFTDPVTLLDGTTIDLEHYGISRVYAWHMPWLIVGAAWILFWFVRKGIIAS
YLRVAEGRDDEATTDEDRRIGAIVLALTILATIFGYAYTNSQFPRTIPLQAGLQKPLTPITSTGTVGVGK
DQVSVDLGGGVYKVPGRELTINVKVKNSTAHPLRLGEYTTAGLRFLNPDVFTTKPEFPDYLLADRGLSTD
PTPIAPGETKDIVVKVQDARWDIERLSDLAYDTDSQIGGLLFFFTPDGQRYAAEIGGPVIPKFVAGDMP

>WP_033157541.1 MULTISPECIES: methane monooxygenase/ammonia monooxygenase subunit B [Methylomonas][pxmB]
MKSLFKPWLLALLCVNVLSIFTVPTAQAHGEKALEPFIRMRTIQWYDVQWSTQKFNVNDEVSVSGKFHVA
EDWPISVPKPEATFLNISTPGPVLIRTERYLNGKPWTNSVALEPGGDYEFKVVMKGRLPGHYHIHPFFNL
KDAGQVMGPGVWLDIGGDPADFSNTIQTINGEMIDMESFGFANGVFWHLFWGALAAAWLLWWVRRPLFIS
RYRMLDAGLEHELITARDKVIAKAVLVGIPVLVLVINSVTNSRYPDTIPLQAGLDRILPLPAQVNAGTVN
VDTLKAEYNVAQRAMVLQVSVDNRSQGAVRIGEFSSSNVHFMNDDLSEVGNVPGKDDVSNKGLSLNDNTP
IAPGEQRTVTIEVRDAAWESEKLDGLIKDADSRVGGLLFLYDDVMGKRYISSISAAVIPKFN

>WP_033159226.1 MULTISPECIES: methane monooxygenase/ammonia monooxygenase subunit B [Methylomonas][pmoB]
MKIIKDKVAKLSFVALLVAMTAAMFYAPTASAHGEKSQAAFMRMRTIHWFDLNWSKEEVPVNETMTISGK
FLVFAGWPETVDKPEVSFLNVGIPGPVFIRAGSWIGGQLVPRSVSLELGEVYEFKVLLKARRPGDWHVHS
MMNVQGGGPIIGPGKWVTITGSMSEFVNPVTTLTGQTINLENYALDNVYFWHAVWFAIAFAWLLFWIKRP
LFVPRHIAVSTGKADSLISAGDKKVGMIFAVGTMVIVAASMGATNEKYPVTTPLQAGLLRGMKTYQMPEA
NVSVKVDDATYRVPGRAMQMTLTITNNGDSAVRLGEFNTAGVRFLDPAVHEDDTAYPDDLLAEEGLTVSD
NSPLAPGETRTIEVTASDAAWEVYRLADLIYDPDSRFAGLLFFWDEKGNRQLVTVDAPLIPTFI

>OOO02386.1 Particulate methane monooxygenase alpha subunit [Chromatiales bacterium USCg_Taylor][pmoB_g]
MSKLAIRTWAAAGLAVVVAATSLYVPEASAHGEKSQQAFLRMRTLHWYDLNWSTDKLRVNEKMTVSGKIH
VFKNWPETTANPEHSPAFLNIGIPGPVFTRVESYMGGQFVPRSVNLELGKNYTFKVVLQARRPGRWHMHT
MMNVEAAGPIIGPGIDGSMADYKHVLTTLTGNTVDIEKVGTAGIWGWSFFWIFFGFAWIGYWAAKPVFVP
RYMARKAGDESIVSPTDVKVGLGFMVATLIITWVGYNAGNSANPITIPLQAGVIGVMEPIPEGAPTVEAK
VEQATYRVPGRSVILKVRVNNRGISPVQVAEFETAGIRFLNGSVYKDETNYPPQLLAPEGLSVDDNSPIL
PGQSKVITLTGTDAAWENERIADVIYDPDSRFGGLLFFVDSSGFRSMAAVGGPLLPRFT
