# Supplementary material for: Lake mixing regime selects apparent methane oxidation kinetics of the methanotroph assemblage
Source: Copernicus journal article supplement (doi:10.5194/bg-17-4247-2020), 2020-08-26
Supplement: Supplementary file 1 [file bg-17-4247-2020-supplement.zip › Supplementary_file_3_custom_database_pmoC.fa.txt]

>WP_085769853.1 methane monooxygenase/ammonia monooxygenase subunit C [Methylocystis bryophila] [pxmC]
MSLSPQALAASSAGEIGGLPWYLRDLPKYLATFVGMTAIYVGFRLYQGAFGISAGLDSSEPAFEAHWMRL
LYLEAAFLAVVFPTLWGYLWLTRDRDLEAITPKEELTRYFTLTMWISIYTFGVYWAGSYFAEQDNSWHQV
AVRDTPFTANHIIEFYFNFPFYILMGGSAWIYARTRLPLYAKGISVPLTLAVVGPFMIFVSVGFNEWGHT
FWFREEFFAVPIHWGFVVGVWFALAVGGILLQQVNRITELLDQIEDAP

>AMK75758.1 methane monooxygenase/ammonia monooxygenase subunit C [Methylomonas denitrificans] [pxmC]
MATTTEHVSLSTEKPKSLPWYLIDLPKYLKGFGFLTIMYIGLRLYQGAFAIAHGLDSSEPAFEQYWMRLF
YIELVIIAAVASGFWGYLWLSRDRQLDQLAPKEEIRRYFTLTMWISIYTFAVYWAGSYFAEQDNSWHQVA
IRDTPFTANHIIEFYFNFPLYVILGGCAWLYARTRLPLYAKGISLPLTLAVFGPFMILVSVGFNEWGHTF
WFREEFFAAPIHWGFVIGVWFALGVGGILLQGVTRLIELLDKIEDAE

>AMK77275.1 methane monooxygenase/ammonia monooxygenase subunit C [Methylomonas denitrificans] [pmoC]
MAATTESVKADAAEAPLLNQKNLWAGITLYLVFYSFIRWYEGVYGWSAGLDSFAPEFETYWMNMLYIEIV
IEVLLFAGINGYIWKTRDRKVMSITPREELRRHFTHWTWLVCYGWAIYWGASYFTEQDGTWHQTIVRDTD
FTPSHIIEFYLSYPIYIITGSAAFMYAKTRLPTYHEGLHLMYLIAVIGPFMILPNVGLNEWGHTFWFMEE
LFVAPLHYGFVFFGWAALAIMGVVNTEVMAIAKLLKKDLA

>WP_085772039.1 methane monooxygenase/ammonia monooxygenase subunit C [Methylocystis bryophila][pmoC2]
MSITTQKAGAAAHAEADVIVNYKPAYIAMLCLGFFYVGIRIYEQYFGWKAGLDSFAPEFQTYWLNLMWTE
LPLEFIAFCGIGGYLWKTRDRNIDAVTPREEMRRLLTLVGWLLVYAFTVYWGASYFTEQDGTWHQTVIRD
TDFTPSHILEFYLSYPIYIIAGWGAFMYARTRIPMFAKNISIPFLMFFAGPFMIFPNIGLNEWGHTFWFM
EELFTAPLHWGFVFFGWFALAVFGVTLQVLGRVIELSKEYEQDVLKV

>WP_085771887.1 methane monooxygenase/ammonia monooxygenase subunit C [Methylocystis bryophila][pmoC1]
MSSTTSTAAGAAAGTDTIVDLKGMWIGLAVLNVFYLIVRIYEQIYGWRAGLDSFAPEFQTYWLSILWTEI
PLELVSGIGLAGYLWKTRDRNVDAVAPREEMRRLVVLVQWLTVYGIAIYWGASFFTEQDGTWHMTVIRDT
DFTPSHIIEFYMSYPIYSVIAVGAFFYAKTRIPYFAHGYSLAFLIVAIGPFMIIPNVGLNEWGHTFWFME
ELFVAPLHWGFVFFGWMALGVFGVVLQILGRIHALVGKEGVALLA

>WP_085771887.1 methane monooxygenase/ammonia monooxygenase subunit C [Methylocystis bryophila][pmoC1b]
MSSTTSTAAGAAAGTDTIVDLKGMWIGLAVLNVFYLIVRIYEQIYGWRAGLDSFAPEFQTYWLSILWTEI
PLELVSGIGLAGYLWKTRDRNVDAVAPREEMRRLVVLVQWLTVYGIAIYWGASFFTEQDGTWHMTVIRDT
DFTPSHIIEFYMSYPIYSVIAVGAFFYAKTRIPYFAHGYSLAFLIVAIGPFMIIPNVGLNEWGHTFWFME
ELFVAPLHWGFVFFGWMALGVFGVVLQILGRIHALVGKEGVALLA

>WP_033157540.1 MULTISPECIES: methane monooxygenase/ammonia monooxygenase subunit C [Methylomonas][pxmC]
MATTTEHVSLSTETPKSLPWYLIDLPKYLKGFGLLAVIYISLRLYQGAFAIAHGLDSTEPAFEQYWMRLF
YIELAVLAVVVSGFWGYLWTTRDRNLDQLAPKEEIRRYFTLTMWISIYTFAVYWAGSYFAEQDNSWHQVA
IRDTPFTANHIIEFYFNFPLYVILGGCAWLYARTRLPLYAKGISLPLTLAVFGPFMILVSVGFNEWGHTF
WFREEFFAAPIHWGFVIGVWFAHGVGGILLQGVTRLIELMEKIEDAE

>WP_033159228.1 MULTISPECIES: methane monooxygenase/ammonia monooxygenase subunit C [Methylomonas][pmoC]
MAATTESVKADAAEAPLLNQKNLWAGITLYLVFYSFIRWYEGVYGWSAGLDSFAPEFETYWMNMLYIEIV
IEVLLFAGINGYIWKTRDRKVMSITPREELRRHFTHWTWLVCYGWAIYWGASYFTEQDGTWHQTIVRDTD
FTPSHIIEFYLSYPIYIITGSASFMYAKTRLPTYHEGLHLMYLIAVIGPFMILPNVGLNEWGHTFWFMEE
LFVAPLHYGFVFFGWAALAIMGVVNTEVMAIAKLLKKDLA

>OOO02384.1 hypothetical protein USCGTAYLOR_01391 [Chromatiales bacterium USCg_Taylor][pmoC_g]
MAASSSAISRAVTAEQPGFLNHRNLWLVVAGFTFFNLFVRWYEEVYGWSAGLDAFAPEFKTYWMNFLYTE
WVLEIVFFSYIGAYLWKTRTRDMDAVTPREEMHRHFHHFVWLLAYGMAIYWGASFYTEQDGTWHQTVIRD
TDFTPSHVIEFYMSYPIYIITGWGAFMYARTRIPMFSKGVSLPYLVVVVGPFMILPNVGLNEWGHTFWWM
EELFVAPLHYGFVFFGWMALGLCGLLSQIFERISELAGPALGTAPAPASKASY

>CCJ06178.1 Methane monooxygenase subunit C [Methylocystis sp. SC2] [pmoC_cis]
MSITKAEARSAARSAERIIDARPVLIGVAVLMFFVAILRLYEQVFAWRFGLDSFSPEFLLYWMGLLQFAI
LASCLGAVGLVGFLWRTRDRDLANLGAAAETRRLVYLVQWLLVFSLALFWGLSFFSEQTAVWHMTAVRDT
DFTPSNIITFYIAYPLFAIIGLGAFFYAKTRLPTFAKGYSLAFVVLVVGVFMTIPNVGFNEWGHTFWAMD
EGFAGPLHWGFVFFGWMSLAVFGVVLLILGRLRELLGADALEQLYRR

>CCJ06303.1 Particulate Methane Monooxigenase subunit C [Methylocystis sp. SC2] [pmoC_cis]
MSSTTDTAARAAAGTEAVVDLKGMWIGLAVLNGFYLVVRIYEQIYGWRAGLDSFAPEFQTYWMSILWTEI
PLELISGIGLAGFLWKTRTRDFSTLTAREEMRRLVVEVQWLVVYAAAIYWGASFFTEQDGTWHMTVIRDT
DFTPSHIIEFYMSYPIYSVIAVGGFFYAKTRLPYFAKGYSVAYLIVAIGPFMIIPNVGLNEWGHTFWFME
ELFVAPLHWGFVFFGWMALGVFGVVLQLLINIQRLIGKEGVALLTE

>CCJ08277.1 Particulate methane monooxigenase subunit C [Methylocystis sp. SC2][pmoC]
MSSTTDTAARAAAGTEAVVDLKGMWIGLAVLNGFYLVVRIYEQIYGWRAGLDSFAPEFQTYWMSILWTEI
PLELISGIGLAGFLWKTRTRDFSTLTAREEMRRLVVEVQWLVVYAAAIYWGASFFTEQDGTWHMTVIRDT
DFTPSHIIEFYMSYPIYSVIAVGGFFYAKTRLPYFAKGYSVAYLIVAIGPFMIIPNVGLNEWGHTFWFME
ELFVAPLHWGFVFFGWMALGVFGVVLQLLINIQRLIGKEGVALLTE

>CCJ08984.1 Particulate Methane Monooxigenase subunit C [Methylocystis sp. SC2][pmoC]
MSSTTDTAARAAAGTEAVVDLKGMWIGLAVLNGFYLVVRIYEQIYGWRAGLDSFAPEFQTYWMSILWTEI
PLELISGIGLAGFLWKTRTRDFSTLTAREEMRRLVVEVQWLVVYAAAIYWGASFFTEQDGTWHMTVIRDT
DFTPSHIIEFYMSYPIYSVIAVGGFFYAKTRLPYFAKGYSVAYLIVAIGPFMIIPNVGLNEWGHTFWFME
ELFVAPLHWGFVFFGWMALGVFGVVLQLLINIQRLIGKEGVALLTE

>CCJ05653.1 Particulate methane monooxigenase subunit C, PmoC2 protein [Methylocystis sp. SC2] [pmoC2]
MNQTTEKAVSAAQAGETDTIVNYKPAYITMGVMLVFYVGIRVYEQYFGWKAGLDSFAPEFQTYWMNLMWT
ELPLEFVAFCGIGGYLWKTRDRNIDAVAPREEMRRILTLIGWLAVYAFSVYWGASYFTEQDGTWHQTVIR
DTDFTPSHILEFYLSYPIYIICGWGAFMYAHTRIPQFAKRISLAFLMFFAGPFMIFPNIGLNEWGHTFWF
MEELFTAPLHWGFVFFGWFALAVFGVARQVLDRVIELSKEYEKDALAL

>AMK77275.1 methane monooxygenase/ammonia monooxygenase subunit C [Methylomonas denitrificans]
MAATTESVKADAAEAPLLNQKNLWAGITLYLVFYSFIRWYEGVYGWSAGLDSFAPEFETYWMNMLYIEIV
IEVLLFAGINGYIWKTRDRKVMSITPREELRRHFTHWTWLVCYGWAIYWGASYFTEQDGTWHQTIVRDTD
FTPSHIIEFYLSYPIYIITGSAAFMYAKTRLPTYHEGLHLMYLIAVIGPFMILPNVGLNEWGHTFWFMEE
LFVAPLHYGFVFFGWAALAIMGVVNTEVMAIAKLLKKDLA
