# Supplementary material for: Lake mixing regime selects apparent methane oxidation kinetics of the methanotroph assemblage
Source: Copernicus journal article supplement (doi:10.5194/bg-17-4247-2020), 2020-08-26
Supplement: Supplementary file 1 [file bg-17-4247-2020-supplement.zip › Supplementary_file_4_TPM_pmoCAB.txt]

pmoA				Transcripts per million								Taxonomic assignment
variant	gene_id	contig	Length (bp)	Nov_Epi	Nov_Hypo	Dec_Epi	Dec_Hypo	Jan_Epi	Jan_Hypo	Jan_Hypo(r)		Domain	Phylum	Class	Order	Family	Genus
pmoA_1	CKCHICCI_895815	k121_412951_5	744	45.1	24.8	435.3	61.7	5102.7	5395.0	9085.7		Bacteria	Proteobacteria	Gammaproteobacteria	Methylococcales	Methylomonadaceae	unclassified_type_Ia
pmoA_2	CKCHICCI_686699	k121_49099_2	750	6500.3	612.2	5010.5	1092.7	1436.7	1820.3	2568.0		Bacteria	Proteobacteria	Gammaproteobacteria	Methylococcales	Methylomonadaceae	Lake_cluster_I
pmoA_3	CKCHICCI_783929	k121_217620_32	513	2704.4	154.8	3609.5	713.8	150.9	158.1	521.6		Bacteria	Proteobacteria	Gammaproteobacteria	Methylococcales	Methylomonadaceae	unclassified_type_Ia
pmoA_4	CKCHICCI_21493	k141_66195_2	744	1026.6	161.3	1695.2	301.4	41.7	27.4	29.8		Bacteria	Proteobacteria	Gammaproteobacteria	Methylococcales	Methylococcaceae	Methyloparacoccus
pmoA_5	CKCHICCI_48608	k141_151227_2	750	19.8	1.6	186.2	24.5	284.1	386.1	651.8		Bacteria	Proteobacteria	Gammaproteobacteria	Methylococcales	Methylomonadaceae	unclassified_type_Ia
pmoA_6	CKCHICCI_125679	k141_392308_3	750	3.7	1.3	44.4	7.3	411.5	470.3	390.5		Bacteria	Proteobacteria	Gammaproteobacteria	Methylococcales	Methylomonadaceae	unclassified_type_Ia
pmoA_7	CKCHICCI_291010	k141_945231_2	744	6.2	1.1	76.3	12.1	320.8	362.2	288.6		Bacteria	Proteobacteria	Gammaproteobacteria	Methylococcales	Methylomonadaceae	unclassified_type_Ia
pmoA_8	CKCHICCI_63876	k141_198477_2	744	18.4	316.9	12.6	271.9	8.7	100.8	53.8		Bacteria	Proteobacteria	Gammaproteobacteria	Methylococcales	Methylomonadaceae	unclassified_type_Ia
pmoA_9	CKCHICCI_90158	k141_280678_2	744	43.6	4.0	79.9	7.1	123.3	108.1	291.1		Bacteria	Proteobacteria	Gammaproteobacteria	Methylococcales	Methylomonadaceae	unclassified_type_Ia
pmoA_10	CKCHICCI_432695	k141_1455349_1	744	1.2	187.3	1.2	86.3	1.5	12.3	6.2		Bacteria	Proteobacteria	Gammaproteobacteria	Methylococcales	Methylomonadaceae	unclassified_type_Ia
pmoA_11	CKCHICCI_59670	k141_185354_2	750	0.1	0.0	1.5	8.5	54.1	124.4	99.0		Bacteria	Proteobacteria	Gammaproteobacteria	Methylococcales	Methylomonadaceae	unclassified_type_Ia
pmoA_12	CKCHICCI_648838	k141_2173000_2	744	0.0	0.0	0.7	0.1	21.4	33.9	99.2		Bacteria	Proteobacteria	Gammaproteobacteria	Methylococcales	Methylomonadaceae	Aquatic_cluster_2
pmoA_13	CKCHICCI_602520	k141_2016551_1	621	2.1	0.6	11.1	2.2	29.0	29.0	21.2		Bacteria	Proteobacteria	Gammaproteobacteria	Methylococcales	Methylomonadaceae	unclassified_type_Ia
pmoA_14	CKCHICCI_261103	k141_831066_2	744	35.4	2.5	39.1	5.4	1.7	1.9	2.8		Bacteria	Proteobacteria	Gammaproteobacteria	Methylococcales	Methylomonadaceae	unclassified_type_Ia
pmoB				Transcripts per million								Taxonomic assignment
variant	gene_id	contig	Length	Nov_Epi	Nov_Hypo	Dec_Epi	Dec_Hypo	Jan_Epi	Jan_Hypo	Jan_Hypo(r)		Domain	Phylum	Class	Order	Family	Genus
pmoB_1	CKCHICCI_783928	k121_217620_31	1245	15456.6	922.2	21421.0	4342.6	916.4	1013.0	3445.7		Bacteria	Proteobacteria	Gammaproteobacteria	Methylococcales	Methylomonadaceae	unclassified_type_Ia
pmoB_2	CKCHICCI_1400682	k121_1348134_1	666	12404.2	1261.0	7515.9	1881.2	2191.7	2932.0	4262.6		Bacteria	Proteobacteria	Gammaproteobacteria	Methylococcales	Methylomonadaceae	unclassified_type_Ia
pmoB_3	CKCHICCI_2164529	k121_2924228_1	1245	53.0	29.0	501.3	76.3	5736.5	6117.8	10476.6		Bacteria	Proteobacteria	Gammaproteobacteria	Methylococcales	Methylomonadaceae	unclassified_type_Ia
pmoB_4	CKCHICCI_21494	k141_66195_3	1233	847.6	122.1	1505.6	234.6	13.6	18.3	20.7		Bacteria	Proteobacteria	Gammaproteobacteria	Methylococcales	Methylococcaceae	Methyloparacoccus
pmoB_5	CKCHICCI_74829	k141_232614_1	759	830.3	42.1	1041.1	171.3	58.5	37.3	123.0		Bacteria	Proteobacteria	Gammaproteobacteria	Methylococcales	Methylomonadaceae	unclassified_type_Ia
pmoB_6	CKCHICCI_2811216	k121_4549403_2	1245	7.3	1.9	78.2	12.1	660.1	663.0	534.7		Bacteria	Proteobacteria	Gammaproteobacteria	Methylococcales	Methylomonadaceae	unclassified_type_Ia
pmoB_7	CKCHICCI_63875	k141_198477_1	1245	21.6	447.2	15.4	365.7	9.4	120.7	62.6		Bacteria	Proteobacteria	Gammaproteobacteria	Methylococcales	Methylomonadaceae	unclassified_type_Ia
pmoB_8	CKCHICCI_48609	k141_151227_3	1245	20.2	2.7	158.4	22.5	317.2	393.4	676.0		Bacteria	Proteobacteria	Gammaproteobacteria	Methylococcales	Methylomonadaceae	unclassified_type_Ia
pmoB_9	CKCHICCI_432696	k141_1455349_2	1245	1.8	212.0	1.8	114.5	0.9	12.8	6.7		Bacteria	Proteobacteria	Gammaproteobacteria	Methylococcales	Methylomonadaceae	unclassified_type_Ia
pmoB_10	CKCHICCI_28138	k141_86940_1	1245	2.6	0.7	2.8	2.4	16.2	182.6	131.4		Bacteria	Proteobacteria	Gammaproteobacteria	Methylococcales	Methylomonadaceae	unclassified_type_Ia
pmoB_11	CKCHICCI_103359	k141_321668_2	1245	1.8	0.4	8.1	20.4	49.5	60.8	123.8		Bacteria	Proteobacteria	Gammaproteobacteria	Methylococcales	Methylomonadaceae	unclassified_type_Ia
pmoB_12	CKCHICCI_129565	k141_404791_1	825	2.0	0.4	13.0	2.9	41.6	42.7	34.5		Bacteria	Proteobacteria	Gammaproteobacteria	Methylococcales	Methylomonadaceae	unclassified_type_Ia
pmoB_13	CKCHICCI_261102	k141_831066_1	1245	38.4	3.3	42.7	8.0	1.1	1.8	1.8		Bacteria	Proteobacteria	Gammaproteobacteria	Methylococcales	Methylomonadaceae	unclassified_type_Ia
pmoB_14	CKCHICCI_531536	k141_1780115_1	786	40.9	8.0	17.1	5.5	1.3	0.7	1.9		Bacteria	Proteobacteria	Alphaproteobacteria	Rhizobiales	Beijerinckiaceae	unclassified_type_II
pmoB_15	CKCHICCI_648837	k141_2173000_1	1245	0.0	0.1	0.6	0.1	24.7	38.0	109.8		Bacteria	Proteobacteria	Gammaproteobacteria	Methylococcales	Methylomonadaceae	Aquatic_cluster_2
pmoC				Transcripts per million								Taxonomic assignment
variant	gene_id	contig	Length	Nov_Epi	Nov_Hypo	Dec_Epi	Dec_Hypo	Jan_Epi	Jan_Hypo	Jan_Hypo(r)		Domain	Phylum	Class	Order	Family	Genus
pmoC_1	CKCHICCI_834089	k121_303165_22	753	24801.3	1378.1	31740.6	6391.7	1273.7	1061.4	3716.8		Bacteria	Proteobacteria	Gammaproteobacteria	Methylococcales	Methylomonadaceae	unclassified_type_Ia
pmoC_2	CKCHICCI_686698	k121_49099_1	420	14163.3	1272.5	9145.5	2181.7	4563.7	2644.1	4059.9		Bacteria	Proteobacteria	Gammaproteobacteria	Methylococcales	Methylomonadaceae	Lake_cluster_I
pmoC_3	CKCHICCI_895814	k121_412951_4	753	101.5	29.9	795.0	118.7	14303.3	9027.8	15648.9		Bacteria	Proteobacteria	Gammaproteobacteria	Methylococcales	Methylomonadaceae	unclassified_type_Ia
pmoC_4	CKCHICCI_142444	k141_445340_1	486	3616.0	382.7	1306.3	344.5	909.0	552.1	839.3		Bacteria	Proteobacteria	Gammaproteobacteria	Methylococcales	Methylomonadaceae	unclassified_type_Ia
pmoC_5	CKCHICCI_125678	k141_392308_2	753	11.9	4.8	100.3	21.4	1537.0	955.1	846.0		Bacteria	Proteobacteria	Gammaproteobacteria	Methylococcales	Methylomonadaceae	unclassified_type_Ia
pmoC_6	CKCHICCI_291009	k141_945231_1	753	19.2	3.9	186.1	35.7	1236.5	788.8	653.4		Bacteria	Proteobacteria	Gammaproteobacteria	Methylococcales	Methylomonadaceae	unclassified_type_Ia
pmoC_7	CKCHICCI_48607	k141_151227_1	753	51.9	5.2	323.2	47.8	1100.4	558.8	969.8		Bacteria	Proteobacteria	Gammaproteobacteria	Methylococcales	Methylomonadaceae	unclassified_type_Ia
pmoC_8	CKCHICCI_131046	k141_409481_1	753	254.8	24.1	351.5	88.9	226.9	107.4	174.1		Bacteria	Proteobacteria	Gammaproteobacteria	Methylococcales	Methylomonadaceae	unclassified_type_Ia
pmoC_9	CKCHICCI_63877	k141_198477_3	753	32.3	426.6	19.4	351.3	12.0	110.7	70.0		Bacteria	Proteobacteria	Gammaproteobacteria	Methylococcales	Methylomonadaceae	unclassified_type_Ia
pmoC_10	CKCHICCI_21492	k141_66195_1	456	316.5	51.2	429.8	83.8	19.8	9.8	7.5		Bacteria	Proteobacteria	Gammaproteobacteria	Methylococcales	Methylococcaceae	Methyloparacoccus
pmoC_11	CKCHICCI_90159	k141_280678_3	753	86.5	4.6	131.1	11.0	398.6	165.0	454.1		Bacteria	Proteobacteria	Gammaproteobacteria	Methylococcales	Methylomonadaceae	unclassified_type_Ia
pmoC_12	CKCHICCI_364319	k141_1229866_1	420	620.8	68.6	67.7	16.7	12.7	5.1	7.7		Bacteria	Proteobacteria	Gammaproteobacteria	Methylococcales	Methylomonadaceae	unclassified_type_Ia
pmoC_13	CKCHICCI_167310	k141_524698_3	702	351.9	30.5	73.8	14.7	8.9	6.5	5.0		Bacteria	Proteobacteria	Alphaproteobacteria	Rhizobiales	Beijerinckiaceae	unclassified_type_II
pmoC_14	CKCHICCI_266298	k141_850242_2	570	72.1	8.7	183.3	45.4	4.3	1.7	2.3		Bacteria	Proteobacteria	Gammaproteobacteria	Methylococcales	Methylomonadaceae	unclassified_type_Ia
pmoC_15	CKCHICCI_240594	k141_758815_3	753	5.9	0.4	6.3	2.9	20.2	210.9	162.7		Bacteria	Proteobacteria	Gammaproteobacteria	Methylococcales	Methylomonadaceae	unclassified_type_Ia
pmoC_16	CKCHICCI_482883	k141_1618043_2	753	1.5	141.1	1.6	71.8	0.8	10.3	4.7		Bacteria	Proteobacteria	Gammaproteobacteria	Methylococcales	Methylomonadaceae	unclassified_type_Ia
pmoC_17	CKCHICCI_82392	k141_255945_1	753	3.3	0.6	12.6	25.7	72.8	71.8	148.7		Bacteria	Proteobacteria	Gammaproteobacteria	Methylococcales	Methylomonadaceae	unclassified_type_Ia
pmoC_18	CKCHICCI_600687	k141_2010355_1	753	3.7	1.5	21.6	3.8	80.4	49.6	37.5		Bacteria	Proteobacteria	Gammaproteobacteria	Methylococcales	Methylomonadaceae	unclassified_type_Ia
pmoC_19	CKCHICCI_59669	k141_185354_1	753	0.1	0.3	2.8	8.1	36.8	78.9	81.8		Bacteria	Proteobacteria	Gammaproteobacteria	Methylococcales	Methylomonadaceae	unclassified_type_Ia
pmoC_20	CKCHICCI_261104	k141_831066_3	753	49.8	3.2	49.5	6.3	2.1	1.8	2.8		Bacteria	Proteobacteria	Gammaproteobacteria	Methylococcales	Methylomonadaceae	unclassified_type_Ia
pmoC_21	CKCHICCI_169023	k141_530397_1	375	65.8	2.6	23.9	2.9	1.8	1.3	0.6		Bacteria	Proteobacteria	Alphaproteobacteria	Rhizobiales	Beijerinckiaceae	unclassified_type_II
pmoC_22	CKCHICCI_394865	k141_1330390_2	753	1.7	45.8	0.5	23.5	0.0	6.7	4.9		Bacteria	Proteobacteria	Gammaproteobacteria	Methylococcales	Methylomonadaceae	unclassified_type_Ia
pmoC_23	CKCHICCI_648839	k141_2173000_3	753	0.0	0.0	1.0	0.1	34.5	32.7	114.7		Bacteria	Proteobacteria	Gammaproteobacteria	Methylococcales	Methylomonadaceae	Aquatic_cluster_2
pmoC_24	CKCHICCI_921527	k121_458352_96	423	41.9	5.1	9.5	1.5	4.7	3.2	4.4		Bacteria	Proteobacteria	Gammaproteobacteria	Methylococcales	Methylomonadaceae	unclassified_type_Ia
pmoC_25	CKCHICCI_237408	k141_748766_3	765	30.4	2.9	15.4	2.7	0.0	0.0	0.0		Bacteria	Proteobacteria	Gammaproteobacteria	Methylococcales	Methylomonadaceae	unclassified_type_Ia
Supplementary table 1 Transcripts per million (TPM) table and taxonomic assignment for genes encoding pMMO (particulate methane monooxygenase) as generated from metagenomics and metatranscriptomic analysis. Taxonomic affiliations were based on blastx searches against the NCBI protein_refseq database and the phylogenetic tree shown in Supplementary Figure 2. Genes found on the same contig were giv…
